# Supplementary material for: Chloroquine Eliminates Cancer Stem Cells Through Deregulation of Jak2 and DNMT1
Source: Oxford University Press journal article supplement (doi:10.1002/stem.1746), 2014-05-09
Supplement: stmcls_32_9_2309_s11.docx [file stmcls_32_9_2309_s11.docx]

| **Sites of Primers** | **Primer Number** | **Sequences** | **Product**  **size (bp)** |
| --- | --- | --- | --- |
| 2370 | 1-1_F | ATCCATCCCCTCCAAATGTTG |  |
| 2172 | 1-1_R | GAGGATCCTGGTGACATGCTC | 199 |
| 1564 | 1_F | CCGACAGAGATGCTGAAGAG |  |
| 1285 | 1_R | CTTCTCTCTGCAGAGCGATC | 299 |
| 650 | 2_F | CGCGGAAGTTAGGTCTCCAG |  |
| 426 | 2_R | GTGACGAGGTAGGGGCAGAG | 225 |
| 522 | 3_F | GGTAGGGAGGGGACAGGAGA |  |
| 322 | 3_R | TTCGATTCGGGACCAGGTAG | 210 |
| -348 | 4_F | AGGCTGATTTCTGGCAGAGG |  |
| -546 | 4_R | GGTAGCCCCACTTCCCTTTC | 199 |
| -527 | 5_F | GAAAGGGAAGTGGGGCTACC |  |
| -714 | 5_R | GTCAGGGTTGGCAAAGAACC | 188 |
| -889 | 6_F | CTCCTAGGGGAGGGCAGTTT |  |
| -1088 | 6_R | AGTAGCCTGAACCCCGGAAA | 200 |
| -1061 | 7_F | AAAGCAGTTTTCCGGGGTTC |  |
| -1261 | 7_R | GGGTCTCCAAGCCCAAACTA | 201 |
| -1566 | 8_F | ATCACCTCTCCCCAGCATGT |  |
| -1759 | 8_R | AGATGGGGGTGCTCACTTTG | 194 |
| -1999 | 9_F | GGAGGCTGAGGCGGGTGGATCACG |  |
| -2201 | 9_R | CAATGGCGCGATCTCGGCTCACC | 203 |
| -2887 | 10_F | TCCCTGCCTGCTCATCTCAG |  |
| -3088 | 10_R | TCCTATGTGCAAGGCACCAC | 202 |
| -3618 | 11_F | CCCATGGTTTCCCATCACTT |  |
| -3822 | 11_R | CTTGTCCCCAGACAGGGAAG | 205 |
| -4367 | 12_F | TTAGAGACCACAACCTGCTTTC |  |
| -4573 | 12_R | CCTGTAAAGGCCCAGGTGTC | 207 |
| -4906 | 13_F | GACAGATGCTGAGCCCTTCC |  |
| -5109 | 13_R | TTGGCATTTAGCAACGCTGT | 204 |
