# Supplementary material for: Chloroquine Eliminates Cancer Stem Cells Through Deregulation of Jak2 and DNMT1
Source: Oxford University Press journal article supplement (doi:10.1002/stem.1746), 2014-05-09
Supplement: stmcls_32_9_2309_s13.docx [file stmcls_32_9_2309_s13.docx]

| Enriched  Functions | Number of Genes | Genes |
| --- | --- | --- |
| Zinc ion binding | 25 | BMP1,  ZNF197,  NANOS1,  BCL11B, ZNF837,  SPG7, KAT6B,  ZNF618,  ZBTB42, VAT1,  PRICKLE4, TRAF4,  KCMF1,  CLIP1, PHF19,  ZNF319,  TRAF3, SKI,  DPF1,  BNC1,  MEX3A,  HAGH, ZC3H7A,  RNPEPL1, ZC3H6 |
| Protein binding | 34 | SH3KBP1,  ILF3,  NANOS1,  HNRNPF,  EIF3B,  CUTA, KAT6B,  RAB4A,  PIWIL1,  MAPK12,  KIF13A,  FOXO1, TAF4,  CTNNBIP1,  TRAF4,  CLIP1,  NECAB3,  PTPN12,  AKT1,  NFATC1,  TCF7L2,  TCEB2,  CDC34, MTSS1,  ANK1,  TRAF3,  SKI,  GLUD1,  MUC1,  SDHA,DVL3,  BBC3,  FMR1,  ERBB2IP |
| Nucleotide  binding | 21 | ADCY2,  MAP3K6,  HNRNPF,  EIF3B,  GNAZ,  SPG7,  RAB4A,  MAPK12,  VAT1,  HSPA1B,  KIF13A, CT6B, RBPMS2,  AKT1,  ATP8B2,  DYRK2,  CDC34,  SKI, GLUD1,  PRKAR1B,  MSI1 |
| Beta-catenin binding | 4 | MED12L,  CTNNBIP1,  TCF7L2,  DVL3 |
| Metal ion  binding | 25 | ADCY2,  BMP1,  ZNF197,  NANOS1,  BCL11B,  GNAZ, ZNF837,  SPG7,  KAT6B,  ZNF618,  ZBTB42,  PRICKLE4,  TRAF4,  KCMF1,  CLIP1,  PHF19,   ZNF319, TRAF3,  DPF1,  BNC1,  MEX3A,  HAGH,   ZC3H7A, RNPEPL1,  ZC3H6 |
| Single-stranded RNA binding | 3 | HNRNPF,  PIWIL1,  MSI1 |
